# Supplementary material for: A Configurational-Game Theoretic Analysis of Consumer Behavior and Platform Strategy in Paid Study Rooms: Evidence from a Chinese Platform
Source: Research Square preprint supplement (doi:10.21203/rs.3.rs-8592354/v1), 2026-02-12
Supplement: Supplementary file 1 [file 56a9bc61339c68a83fad60bc.docx]

**Appendix** **B: PSRs’ Game Model Proof**

**Proof for** **Proposition 1:** The profit function of the PSR platform is:

Where represents the fixed cost, which does not affect the optimal pricing decision. To maximize profit, we calculate the first derivative of profit with respect to price :

To find the extreme value point, set the first derivative to zero:

Solve for the equilibrium price, simplify and differentiate with respect to :

To ensure that is a maximum point rather than a minimum point, calculate the second derivative:

Since  , the second derivative holds true. Therefore, the profit function is strictly concave at , confirming that is the unique global profit-maximizing price.

Market coverage condition: The location of the indifferent user must be within the interval , which requires  . This ensures the coexistence of PSR and home learning (H), preventing a single mode from monopolizing the market.

Platform profitability condition: The gross profit (before deducting fixed costs) of the platform at the equilibrium price must be positive, that is,  . Substituting   yields:

This condition is consistent with the cost threshold in Corollary 2 and serves as the foundation for efficient investment.

Q.E.D.

**Proof for Corollary 1:** From Proposition 1, the profit-maximizing equilibrium price is:

This is a linear function of the parameters , , and . The first-order partial derivatives are calculated as follows. Sensitivity to marginal cost:

Since the second derivative , this relationship is linearly monotonically increasing. Sensitivity to preference intensity :

Similarly, the second derivative is zero, indicating a linear monotonic increase. Sensitivity to productivity multiplier :

The second derivative is zero, confirming a linear monotonic increase.

Q.E.D.

**Proof for Corollary 2:** Substitute the equilibrium price  into the equilibrium profit function .

After algebraic simplification, we obtain the explicit profit expression (ignoring the fixed cost  as it does not affect the derivative):

Take the first-order partial derivative with respect to :

Therefore, the necessary and sufficient condition for  is:

Q.E.D.

**Proof for Corollary 3:** Start from the simplified profit expression in Corollary 2: .First, find the first-order derivative:

Next, find the second-order derivative:

Let  and . The sign of the second derivative is determined by the sign of .

Convex region: When , , the profit function is convex at *t*. This occurs when  and  have the same sign. Analysis shows this holds when cost  satisfies: . Note that the right boundary is exactly the threshold  from Corollary 2. Within feasible parameters (), the left boundary is typically negative, so the meaningful convexity condition simplifies to  and  is not too small.

Concave region: When , , the profit function is concave at *t*. This occurs when  or when  is extremely low (less than the left boundary).

Q.E.D.

**Proof of Corollary 4:** Again, using the simplified profit expression: .Takethe first-order partial derivative with respect to :

Since in a feasible equilibrium (ensuring positive market demand), the numerator term  (see Corollary 2 condition), we have . Profit strictly decreases as cost increases.

Proof of moderating effect: Now, examine how the sensitivity of profit to cost is influenced by  and . Calculating the cross-partial derivatives, we moderate role of preference intensity :

Within feasible parameter ranges (typically ), this cross-derivative is positive. This means that as  increases, the first-order derivative of profit with respect to cost,  (a negative number), decreases in absolute magnitude (it moves closer to zero). In other words, a higher  attenuates (buffers) the negative impact of a cost increase.

Calculating the cross-partial derivatives, we moderate role of productivity multiplier:

This cross-derivative is negative. This means that as  increases, the first-order derivative  (a negative number) becomes less negative (also moving closer to zero). In other words, a higher  also buffers the blow of a cost increase.

Q.E.D.
