# Supplementary material for: A Configurational-Game Theoretic Analysis of Consumer Behavior and Platform Strategy in Paid Study Rooms: Evidence from a Chinese Platform
Source: Research Square preprint supplement (doi:10.21203/rs.3.rs-8592354/v1), 2026-02-12
Supplement: Supplementary file 2 [file b669410266926c658d4f387f.xlsx]

## Sheet: fsQCA_import
Index	PP	PC	PR	EU	FC	CI	CB
1	3.4	3	1.66667	3	3	3.33333	3
2	4.6	3.33333	1.33333	3.5	4	5.33333	5
3	4.2	3	2.33333	3.25	3	4	4
4	5.4	2.66667	3.33333	3.5	5.25	3.66667	6
5	5	4.33333	3	3	4.25	4.66667	4.5
6	5	4	2.66667	4	3.75	4.33333	6
7	4.2	3	1.33333	5	4.25	5	6
8	5.8	3	1.66667	4.5	3	3.66667	6
9	7	7	1	7	7	7	4
10	5	4	3	4.25	4	4	4
11	6.8	4.33333	1.66667	4.5	5	6	5
12	5	3	2	3.5	3	5.33333	5.5
13	6.4	3	1.33333	6.5	5	6	6
14	5	2.33333	1	4.25	2.25	4.66667	6
15	3.8	3.66667	3	2.75	2	3.33333	2.5
16	4.8	2.66667	1	3.5	2.25	4.33333	5
17	2	2	5	2	2	2	2
18	4.6	3.66667	2	4.25	3.75	4.33333	5
19	4	4.33333	2.33333	4	2.5	3.66667	5
20	5	4	3	3	4	4.33333	4
21	2	3.66667	4	3	1.75	4	4
22	4.8	4.33333	1.33333	4	2.75	4.33333	5
23	1	4.66667	1.66667	2.75	1.25	2.33333	1.5
24	4	2.66667	2	5.25	1.25	4.33333	5
25	1.6	5.66667	2.33333	4.25	4	5.33333	5
26	3.8	3	1.33333	5	2.75	4.33333	4
27	4	3.33333	1	3.25	2.5	5.66667	4
28	4	4	3	4	4	4	4
29	4.6	4.66667	1.33333	4	3.25	4	4.5
30	5.4	5	1	3	2	4.33333	6.5
31	3.4	4.66667	2.66667	5.25	4.75	4	4
32	7	3	1	4	5	4.66667	7
33	3.4	6	2	3.25	2.75	4.33333	2.5
34	4	4	2.33333	4.25	3.25	6.33333	4
35	4.2	4	2.33333	2.75	4.5	4	4
36	1	1	6	6.25	6.25	7	7
37	5	6	2.33333	2.25	2	1.66667	2
38	3.6	5	3.66667	3.5	2.25	4.66667	1
39	5	4	2	3.5	4	5.33333	5
40	5	3.66667	1	5.25	3.75	6	5
41	4.4	4.33333	2.33333	4.25	3.25	4.66667	3.5
42	6	4	3	6	6	6	6
43	1	1	6	1	1	1	1
44	6	3.33333	3	4.5	4.25	4.66667	4
45	5.2	2.33333	1.66667	5.5	5	5.33333	6.5
46	4	5	1.33333	5	5	4.66667	6
47	4	3.66667	1.66667	5.75	4.5	5	6
48	3	1.33333	4.33333	4.25	3.5	6.33333	5
49	2	4.66667	2	2	2	4	3
50	3.6	4	2.33333	3.25	5	3	4
51	4.8	4.33333	2.66667	4.75	4.25	5	4
52	1.6	2	4	1.75	1	4.33333	2.5
53	7	1	6	7	5	7	7
54	5.4	4	1.66667	3	4	5.33333	4
55	6.2	4	3	4	3.75	4.66667	5
56	2.6	2	6	3	1	2	2.5
57	5	3.33333	2	3.75	3	3.33333	4
58	4.6	4	1.33333	3.5	2.5	4.66667	6
59	4.6	3	2.66667	3.75	2.5	4.66667	6
60	4.4	3.33333	2	4.25	4.25	5	5
61	2	1.66667	1	2	5.25	6	4
62	5.4	4	3	4.25	3.25	4	4
63	4	4	3	4	4	4	4
64	5.8	3	2.33333	6.25	3.5	6.33333	7
65	6.4	1.33333	3	4	5	5.33333	5
66	3.2	4	1.66667	4.25	3.25	5	4
67	3.2	3.33333	2.33333	3.5	4	3.33333	3
68	2.4	7	1	1	1	1.33333	2.5
69	6	4	3	6	3.25	4.66667	4
70	5	5.66667	1.33333	4.5	5	6	5
71	4.4	4.66667	1.33333	3.5	2.5	4	5
72	4.8	4.33333	1.66667	3.5	2.25	4.33333	4
73	5.2	3.66667	3	5	3.5	4.33333	4
74	1	2.66667	1.66667	5	2.75	5.33333	4.5
75	5.8	4	2.33333	5.25	3	6	7
76	5.2	4	3	4.25	4	5.66667	4
77	2.2	3	4.66667	6	1.75	6	5
78	5.8	2.66667	1	2.75	1.5	4	3
79	1	1	6	1.75	1	1	1
80	2.8	2.33333	3.66667	3	3	3.33333	3.5
81	1	3	4	2.75	4	7	3.5
82	6	4	3	4	4	4	4
83	4	4	3	4	4	4	2
84	7	3.33333	1	5	3	4.66667	6
85	3	3	4	3	3	3	3
86	3	5.33333	1	3	3.5	5	3.5
87	4.4	4.33333	2	4	3.75	3.66667	4
88	1	1	6	1	1	1	1
89	5	4	3	4.5	4	4.33333	4
90	4.2	3.66667	2	2.75	4.25	4.33333	4
91	3.4	3	2.66667	4.25	3.25	4.66667	6
92	5.4	4	2	3	4.5	4	5
93	4.6	3.66667	1.66667	5	5.25	4	5
94	5.2	4	2	4.25	2.25	2.66667	5
95	2	4.66667	1	3	2	4.66667	4.5
96	5.4	3	3	6	4.5	6.66667	5.5
97	4.2	4.33333	1.66667	5.25	4.25	5.66667	6
98	4.6	4.33333	1.33333	3.5	2.5	5	2
99	3.2	3.66667	1	3.25	4.25	4.33333	3.5
100	5.4	3	2	4	4	4.33333	4
101	6.4	4.66667	1.33333	3.5	3.75	3.33333	4
102	5.4	5	1	4	4	4	7
103	5.2	4.66667	1.33333	5.75	5.75	4.66667	5.5
104	2	2.33333	1	2.75	3.25	4.66667	2
105	4.4	4	3.33333	4.25	4	4	4
106	1.4	7	6	1	1	1	1
107	4	4	3	4	4	4	4
108	5	3.66667	2	4	4	3.66667	4.5
109	5.4	6.33333	1	6.25	4.25	6	5
110	5.4	6.33333	1.66667	5.25	6.25	4.66667	6
111	4	4	2	4.75	4.5	4	5
112	3.4	3	4	3.75	3	3	3
113	5.2	3	2.66667	4	2.5	4.66667	4.5
114	5.8	4	1.66667	4.5	4.5	5	4.5
115	4	4	3	4	4	4	4
116	7	4	3	6.25	7	7	4
117	1	2	3.66667	4.75	2.5	5.66667	4.5
118	6	2	1	5.25	6	7	7
119	7	1.33333	1	4.5	3.5	6.33333	7
120	5.2	4	4	1.75	1.75	2.66667	3.5
121	4.4	4.33333	2	4	4	4.33333	4
122	3.4	3	4.33333	2.25	3.25	2.66667	3
123	4	4	1.33333	4	3.75	6	5
124	5	4	2	4.5	4	3.66667	4
125	5	4.33333	3	5	5	4.66667	3.5
126	7	2.33333	4	3.25	1.75	3	2
127	1	5	3.33333	2.75	4.25	3.66667	4
128	6	4	3.33333	6	6	6	6
129	6.6	4.33333	1	2.25	2.5	4	4
130	2	4	2.33333	5	2.25	2	3
131	4.6	5	1	3.75	1.25	3.66667	2
132	1.4	4.66667	3	5	3.5	3.66667	4.5
133	5.8	3.66667	1.66667	3.75	4.5	5.33333	5
134	4.6	3.33333	2	4.5	4.5	4.66667	5
135	7	4	1	6	1.5	3.33333	5.5
136	4.6	4.33333	2.66667	3.75	2.25	5	4
137	5	3	2.66667	5.25	4	6	5.5
138	4	4	3	4	4	4	4
139	4	4	1	3.25	4	4.66667	5
140	5.8	1	1.33333	4.5	5.5	7	5
141	4.8	3.66667	2	4.75	4.25	5	4
142	4.2	3.33333	3	4.25	2.25	2.33333	3.5
143	4	4	3	4	4	4	4
144	6	3.66667	2	4.25	2.25	4.66667	1.5
145	1	2	4.33333	1.5	3	3.33333	2.5
146	1	4	3	2	3.5	3.33333	4
147	5	3.33333	3.33333	3.75	2.75	3.66667	3
148	3	4	2.66667	4	2.25	2.66667	4
149	7	2	1	6.75	6.75	7	7
150	6.4	1	1	6.5	5	6.33333	7
151	5.8	2.33333	1	6.75	7	6.33333	7
152	7	2.66667	1	5.75	5.5	6.33333	7
153	3.6	3	3	5.25	3.75	5	4
154	4.4	3	2	4.75	3	3.33333	6
155	5.6	3	1	3.25	2	4.66667	6
156	6.2	1.66667	1	7	7	6.33333	7
157	4.8	1	1	6.25	7	7	7
158	7	1	1	7	7	7	7
159	3.8	3.33333	2.66667	4.5	4.5	4.66667	5
160	5.6	1.66667	1	5.5	5.5	5.33333	7
161	2.6	3.33333	1.66667	3.75	1.5	5	4.5
162	4	4	3	4	4	4	4
163	5	1	1	4	4	7	5
164	4.4	4	2	3.25	1.75	4	4
165	7	4	3	6.25	5	7	7
166	1	1	3.33333	3	2.75	6.33333	4
167	6.8	3	1	6.5	5	6	7
168	3.4	4	3.66667	3.75	3.75	5	4
169	7	1	1	7	7	7	7
170	5.4	3.66667	1	5.5	4.5	5.33333	5
171	5.4	2.66667	1	5.25	2.75	3.66667	6
172	3.2	4	3.33333	5	6	4.33333	6
173	6	2.33333	1	5.25	5	5	6
174	6	2	1	6.75	7	6.33333	6.5
175	5.4	2	1	6.25	6.25	6.66667	7
176	6	1	1	6.25	5.5	6.33333	7
177	5	2.66667	1	5	5.75	5.33333	6
178	6	1	1	5.5	6.75	7	7
179	3.2	2.66667	3.33333	2.5	2.75	2.66667	3.5
180	5	3.33333	2.66667	5.75	3.5	6	6
181	4.6	4.33333	4.33333	4.5	4.75	4	4.5
182	5	4	3	4.25	4	4.33333	4
183	4.4	4	2	3.75	3.5	3.66667	5
184	6.4	5	1	3	3.25	5	4.5
185	5.2	3.66667	1.66667	4	3.25	4	5
186	4	1	2	4.25	4.5	4.33333	6
187	7	1.33333	1	7	7	7	7
188	4.6	1	1	4.5	4.5	5	7
189	6.6	1	1	6.5	6.5	6.33333	7
190	4	2.66667	1	5.5	6	5.66667	7
191	6.2	1	1	6	6.5	6	7
192	4.6	2	1	5.25	5.5	5.33333	6
193	5	1	1	4.75	5	5.33333	7
194	4.2	1	1	4.25	4.75	5.33333	7
195	4	1	1	4.75	4.5	4.66667	7
196	3.8	1	1	4.25	3.5	4.33333	6.5
197	5.2	1	1	6.25	5	5.33333	7
198	6.2	1	1	6.5	7	4.66667	7
199	4	1	1	5.25	6	6	7
200	3.8	1	1	4	5.25	5	7
201	6	1	1	6.75	5.5	5.66667	7
202	3.8	1	1	5.75	6.5	6	7
203	6	1	1	6.5	6.75	6.33333	7
204	3.8	1	1	4.5	6	6.33333	7
205	4	1	1	4.75	6	5.33333	7
206	5	1	1	5	6	6	7
207	4.6	1	1	5.75	5.5	6	7
208	4	1	1	5.25	6.75	6.66667	7
209	3.6	1	1	4	4	4	5.5
210	3.8	1	1	4.75	4.5	4.33333	7
211	7	1	1	7	7	7	7
212	5.6	1	1	5	5	6.33333	7
213	5.6	1	1	6.75	6	5.66667	7
214	4.8	1	1	4.5	3.5	5.66667	7
215	6	1	1	6	5.75	6	7
216	5.4	1	1	5	5.75	6.33333	7
217	5.8	1	1	6.75	7	7	7
218	5	2	1	4.25	4.25	5	6.5
219	5.2	1	1	4.75	4	5	6.5
220	5	2	1	4.5	3.5	6.33333	6
221	5.8	1	1	5.75	2.5	7	7
222	4.8	1	1	5	3	5.66667	7
223	5.4	1	1	4.5	3.75	6.33333	6
224	5.6	1	1	5	4.5	6	7
225	3.2	4	3	2.5	3	3.66667	5
226	3.8	2.33333	2	3.25	2.75	5	5
227	6.6	2.66667	1	4.75	4.5	6.33333	4
228	1	2.66667	2	4.25	3	3	6
229	4.8	4	1.66667	4	3.25	5	3
230	4.8	2	3.66667	6	3	5	5
231	5.8	4	2	4	5.25	5.66667	5
232	4	3.66667	3.66667	4	3.5	3.66667	3.5
233	5	4	1.66667	4.25	3.25	4.33333	4
234	4.2	4	1	4.5	3.75	4	5
235	4.8	4	1.33333	4	4	5.33333	4.5
236	2	3	2.33333	2.5	1.5	3	3
237	7	4.33333	1	5.25	4.5	5.33333	6
238	5	5	2	5	5	5	5
239	6.4	4	1	4.5	3	5.33333	6
240	5.6	4.33333	1.33333	4	2.75	4	4.5
241	3.8	3.33333	3.66667	4	3.5	4	3.5
242	3	3	2.33333	4	2.5	4.33333	3
243	4.6	4.33333	1	3.75	4.25	5.33333	4.5
244	2.6	3	2	4	4.25	2	4
245	4.4	2	2	4	3.25	3.66667	5.5
246	5.6	4.33333	1.33333	2	4.5	4	4
247	5.2	5	1	2.5	2.75	4.33333	6
248	6	3.33333	2.33333	3.25	5	6.33333	6
249	1	1.33333	5	1.25	1	1	2
250	4.2	5	1	4	2	4	3
251	1	4	2.33333	1.75	2.75	3	6.5
252	5.6	4.33333	1.66667	4.25	3	4.66667	4
253	5.2	4	1.66667	4	3.75	4.33333	4
254	5.6	2.33333	2	5	6.5	6	4.5
255	4.4	4	1	4.25	4.75	5	6
256	5	4.66667	2.33333	3.5	3.5	5	3.5
257	6	3	1.66667	5	4.5	7	7
258	6.8	3.33333	1.66667	4	4.25	6	5
259	4	4.66667	2.66667	2.5	2.5	2.33333	2.5
260	5.4	4.66667	3.66667	5.25	3.25	4	4.5
261	5	5	2	5	5	5	5
262	1	1	6	1	1	1	1
263	5	4	2	4	3.25	4	4
264	5.2	4	2.66667	5	4	5	4.5
265	4	4.66667	1	2	3	4.66667	4.5
266	4.6	3.33333	2.33333	4.75	2	3.66667	5
267	7	3.66667	2.33333	4.25	3.75	3.33333	4
268	6	6	1.66667	5.25	5.25	6	5
269	3	3.33333	1	5	3.5	4	5
270	1	3	4	2.75	1.75	1	3
271	5.8	3.33333	1	5.25	4.75	6	6
272	5.8	4.66667	2	4	3.75	4.33333	4
273	3.8	3	1.66667	5	2.25	4	4
274	4.6	4.33333	1.66667	2.25	1.5	4	2
275	4	3.33333	2	4.5	3.75	4.33333	4
276	4	4	3	4.25	4.5	6	5
277	5	3.66667	3.33333	3.5	3.25	4	4
278	4.2	4.66667	1	2	1	4.33333	5
279	4.8	3.66667	2	4.25	3	5.33333	5
280	4	5	1	3.25	2	3.66667	3
281	3.8	2.66667	1.66667	5	2.75	5	2.5
282	4	4.66667	3	3.5	2	4	2.5
283	6	3.66667	1.33333	4.25	4.25	6	6
284	4.8	3	1.66667	3.25	4	5	5
285	3	4	1.66667	4	2	1.66667	4
286	5.2	4.66667	2.33333	4.75	5	4.66667	5.5
287	2.4	2.66667	4.33333	5.25	5	2	3.5
288	2	3	4	5.5	4.75	5	4.5
289	6	3.33333	1.33333	3.25	3.5	4.66667	4
290	5.8	2	3.66667	4	1.75	3	2.5
291	4.4	3.33333	1	3.25	2	5	4.5
292	6.4	5.66667	1	3.75	4.25	5.66667	6
293	6.2	3.33333	1	3	2.5	4	7
294	6.4	5	1	4.25	3.5	5.66667	5
295	3.2	4	3	4	4	4	4
296	4	4	3	3.75	3.5	2	4.5
297	6.2	4.66667	1	4.75	5.25	4.66667	6
298	5	5.66667	1	5.25	4.5	5.33333	5
299	6	3.66667	1.66667	6.25	4.75	6.33333	5
300	3	3	4.33333	4.75	5.75	5	6
301	4.2	3.66667	2	4.5	2.5	5	4
302	3.6	3.33333	2.66667	3.25	3.25	4.66667	4
303	3	1.66667	3.66667	4.75	4.25	6	4.5
304	6.6	3.66667	1.66667	4.75	4	4.66667	4
305	3.8	1	2	4	2	6	4
306	3	3	4	2.5	2.5	2	3.5
307	5	3	4	5	5	5	3
308	4	4	3	4	4	4	4
309	4	4	3	4	4	4	4
310	7	2.66667	2	5.75	4.75	7	5.5
311	5	5.33333	2.66667	4.25	4.25	5	4.5
312	6.6	4	2.33333	4.5	4.25	6	4.5
313	5.6	3.66667	2.33333	4	4.25	5	5
314	2.6	2	5	4	4	4	5
315	6.2	4	1	4.5	4.25	6.33333	6
316	3.6	4	1.33333	2	2.75	3.66667	3
317	5.8	2.33333	1.66667	5.5	4.75	6.33333	6
318	4.8	3.33333	2.66667	4	2.75	3.66667	3
319	4.4	4	1.33333	4	3.75	4	4
320	5.4	2	2.66667	2.25	2.5	4.66667	4
321	6.2	4.33333	2.33333	5.5	3.25	4.33333	3.5
322	5	4	1	5.25	3.75	4.66667	4
323	6	3	1	4	3	3.66667	4
324	4.2	4.66667	1	4	3.75	6	5
325	5	4.33333	2.66667	4	3.25	4.66667	5
326	5.8	1	4	5	2.75	6.33333	2.5
327	1	1	6	1	1	1	1.5
328	5.4	3.33333	1.66667	5	2.5	4.66667	5
329	7	3	1	4.75	2	4.66667	7
330	4.4	2	2	4	4.5	4.33333	4
331	4.2	4	2	3.5	3.25	4	2.5
332	5	5	2	3	3	3	5
333	6	4	3	4.5	3.5	5.33333	5
334	5	5	1	6	4.25	6	4.5
335	4.6	2.66667	2	4.75	3.5	4	4
336	5.4	3.33333	1.33333	3.75	4	5	6
337	4.8	4.33333	1	4.75	5.5	5	7
338	5.8	3	1.33333	3	4.75	5.33333	5
339	6.4	4.66667	1	3	2.75	4.33333	6
340	5.6	1.66667	2.66667	5.75	5.75	5.33333	4
341	3	4.33333	1.33333	4	2.75	4	4
342	2.8	3	1.33333	5.25	3.5	5.66667	4
343	6	6	1	6	6	6	6
344	7	1	1	6.25	7	7	7
345	6	4	1	3.25	2	3.33333	5
346	5.8	4	2.66667	4	1.75	3	7
347	4	4	3	4	4	4	4
348	5.6	4	1	5	3.5	4	4
349	5.6	3	1	5.25	2.5	4.33333	6
350	5.4	2	2	5	6	5.33333	5
351	4.6	2.33333	3	4.25	4	4.66667	6
352	4	5	1	2.25	3	3	3.5
353	5.2	5.33333	1	4	4.25	4	6
354	5.6	2.66667	1.33333	5.25	5.75	5.33333	5.5
355	4	4	3	4	4	4	4
356	4.6	3	3	4.5	2.25	3.33333	5
357	3.2	3.33333	2.66667	2	2	4.66667	3.5
358	7	4.66667	1	4.25	3.25	6	6.5
359	5.6	4.33333	2	4	3.5	4.33333	4
360	5	3.33333	2.33333	6.5	3	4.33333	5
361	6	4	1	5.75	3.5	5.33333	6.5
362	5.6	3.33333	1.33333	4	3.25	5.33333	6
363	4.8	4	1.33333	4	2	3.66667	4
364	5.8	1	6	1	1	1.66667	1
365	5.6	1	1	4.25	3.25	5.33333	5.5
366	6	4	1	4.5	3	4.66667	4
367	6	5	2	4.75	3.25	3.66667	4.5
368	5	4	3	4	4.5	4.66667	4
369	5.6	5	2	3.25	2	5	4
370	6.4	3	4.33333	3.75	2.5	3.33333	4.5
371	5.8	5	1.66667	3.75	2.5	3.66667	5
372	4.8	2	1.33333	4.5	3.75	5.33333	4.5
373	5	4	3	3.5	3.75	4	4
374	5.8	1	1	6.25	4.5	7	7
375	5	4.66667	4.66667	2.5	4.25	2.66667	2.5
376	5.6	4.33333	2.66667	2.25	2	3.66667	4
377	5.4	1	1	5.5	4.25	6.66667	7
378	6.4	1	1	4	4.5	6.66667	7
379	5.2	2.66667	2	4	4.75	4.33333	5
380	5.6	2	1	4.25	4.75	6.66667	7
381	5	1	1	5	4	6.66667	7
382	4.2	1	1	4.5	5.5	5.33333	7
383	5.2	3.33333	4	3.5	2.5	4.33333	5
384	3.4	7	1	1	1.25	1	7
385	7	1	1	4.75	5.5	7	7
386	4	1	2.66667	6	4	6	6
387	5.4	3.33333	1	3.5	2.25	4.33333	4.5
388	5.4	1	1	6	6	7	6
389	5	1	1	5	5.5	6.66667	6
390	4.4	3	4	5.25	2.75	4.66667	4
391	5	1	1	5	4.75	7	7
392	4	1	1	4	4.75	6.66667	7
393	4	1	1	4	7	6.66667	7
394	6	3.33333	1	3.25	2.75	5	6
395	5.2	3	3.33333	5.25	5.5	4.66667	6
396	5.2	2.66667	1	2.25	3.75	4.66667	6
397	5.2	2.66667	3.66667	2	2.25	4.66667	3
398	6.2	3.66667	3	3.25	2.25	5	4
399	5	5.33333	2	5.25	5	5.66667	4.5
400	7	7	1	7	7	7	7
401	3.4	3.33333	2	3.5	2.5	3.33333	4
402	5.2	4	3.33333	3.25	3.25	4.33333	4.5
403	5.4	3	2.33333	4	2	4	4.5
404	7	3	2	5	4	5	7
405	3.6	4	3	2.25	3	5.33333	5
406	7	3	3.33333	4.5	3	5	5.5
407	4.6	4.33333	2	4	2.25	4	5
408	3.8	3.33333	4	3.5	3	4.66667	2.5
409	5.8	6	1.33333	5	5.75	6	6
410	6	4.33333	4.66667	4.75	3.5	2.66667	3
411	4.8	3	1	4.75	3.25	3.66667	4.5
412	5.2	3	2	4.25	3.25	4.66667	6
413	6	4	2	3	2.75	5	5
414	4.6	4.66667	1.33333	4	2.5	4.33333	6
415	4	4	3	3.5	4	4.66667	4
416	5.4	3.33333	3.66667	5.5	4.25	5.33333	6
417	5.4	3	2.66667	5.25	4.75	6	6
418	6	4.33333	2.66667	7	6.25	7	5
419	1	5	2.66667	3.5	2.25	3.66667	4
420	4	4	2	3.75	3	3.66667	5
421	7	7	1	7	7	7	7
422	4.2	5	2.66667	5.5	4.75	5	3.5
423	4.6	4.66667	1.66667	4	2.75	3.33333	4
424	5.8	4.33333	1.66667	5.25	4	5	5
425	5.8	2.66667	2.33333	4.25	3.5	3.66667	3
426	7	4	1	4.25	3.75	4.33333	5
427	2	4	3	3.5	3.5	3	4

## Sheet: fsQCA_calibrate
Index	PP	PC	PR	EU	FC	CI	CB
1	0.201	0.391	0.271	0.161	0.261	0.151	0.081
2	0.421	0.501	0.121	0.271	0.571	0.701	0.501
3	0.341	0.391	0.611	0.211	0.261	0.301	0.231
4	0.651	0.301	0.851	0.271	0.841	0.221	0.821
5	0.501	0.831	0.781	0.161	0.631	0.501	0.351
6	0.501	0.741	0.701	0.421	0.501	0.391	0.821
7	0.341	0.391	0.121	0.731	0.631	0.611	0.821
8	0.771	0.391	0.271	0.581	0.261	0.221	0.821
9	0.951	1.001	0.051	0.981	0.971	0.951	0.231
10	0.501	0.741	0.781	0.501	0.571	0.301	0.231
11	0.941	0.831	0.271	0.581	0.801	0.851	0.501
12	0.501	0.391	0.501	0.271	0.261	0.701	0.681
13	0.891	0.391	0.121	0.951	0.801	0.851	0.821
14	0.501	0.221	0.051	0.501	0.111	0.501	0.821
15	0.261	0.631	0.781	0.121	0.081	0.151	0.051
16	0.461	0.301	0.051	0.271	0.111	0.391	0.501
17	0.071	0.151	0.981	0.051	0.081	0.031	0.031
18	0.421	0.631	0.501	0.501	0.501	0.391	0.501
19	0.301	0.831	0.611	0.421	0.151	0.221	0.501
20	0.501	0.741	0.781	0.161	0.571	0.391	0.231
21	0.071	0.631	0.931	0.161	0.061	0.301	0.231
22	0.461	0.831	0.121	0.421	0.201	0.391	0.501
23	0.031	0.901	0.271	0.121	0.031	0.051	0.011
24	0.301	0.301	0.501	0.791	0.031	0.391	0.501
25	0.051	0.981	0.611	0.501	0.571	0.701	0.501
26	0.261	0.391	0.121	0.731	0.201	0.391	0.231
27	0.301	0.501	0.051	0.211	0.151	0.781	0.231
28	0.301	0.741	0.781	0.421	0.571	0.301	0.231
29	0.421	0.901	0.121	0.421	0.331	0.301	0.351
30	0.651	0.941	0.051	0.161	0.081	0.391	0.901
31	0.201	0.901	0.701	0.791	0.751	0.301	0.231
32	0.951	0.391	0.051	0.421	0.801	0.501	0.951
33	0.201	0.991	0.501	0.211	0.201	0.391	0.051
34	0.301	0.741	0.611	0.501	0.331	0.891	0.231
35	0.341	0.741	0.611	0.121	0.691	0.301	0.231
36	0.031	0.051	0.991	0.941	0.941	0.951	0.951
37	0.501	0.991	0.611	0.061	0.081	0.021	0.031
38	0.231	0.941	0.901	0.271	0.111	0.501	0.011
39	0.501	0.741	0.501	0.271	0.571	0.701	0.501
40	0.501	0.631	0.051	0.791	0.501	0.851	0.501
41	0.371	0.831	0.611	0.501	0.331	0.501	0.141
42	0.821	0.741	0.781	0.911	0.921	0.851	0.821
43	0.031	0.051	0.991	0.011	0.021	0.011	0.011
44	0.821	0.501	0.781	0.581	0.631	0.501	0.231
45	0.571	0.221	0.271	0.841	0.801	0.701	0.901
46	0.301	0.941	0.121	0.731	0.801	0.501	0.821
47	0.301	0.631	0.271	0.881	0.691	0.611	0.821
48	0.151	0.071	0.951	0.501	0.411	0.891	0.501
49	0.071	0.901	0.501	0.051	0.081	0.301	0.081
50	0.231	0.741	0.611	0.211	0.801	0.111	0.231
51	0.461	0.831	0.701	0.661	0.631	0.611	0.231
52	0.051	0.151	0.931	0.031	0.021	0.391	0.051
53	0.951	0.051	0.991	0.981	0.801	0.951	0.951
54	0.651	0.741	0.271	0.161	0.571	0.701	0.231
55	0.861	0.741	0.781	0.421	0.501	0.501	0.501
56	0.111	0.151	0.991	0.161	0.021	0.031	0.051
57	0.501	0.501	0.501	0.341	0.261	0.151	0.231
58	0.421	0.741	0.121	0.271	0.151	0.501	0.821
59	0.421	0.391	0.701	0.341	0.151	0.501	0.821
60	0.371	0.501	0.501	0.501	0.631	0.611	0.501
61	0.071	0.111	0.051	0.051	0.841	0.851	0.231
62	0.651	0.741	0.781	0.501	0.331	0.301	0.231
63	0.301	0.741	0.781	0.421	0.571	0.301	0.231
64	0.771	0.391	0.611	0.941	0.411	0.891	0.951
65	0.891	0.071	0.781	0.421	0.801	0.701	0.501
66	0.181	0.741	0.271	0.501	0.331	0.611	0.231
67	0.181	0.501	0.611	0.271	0.571	0.151	0.081
68	0.101	1.001	0.051	0.011	0.021	0.011	0.051
69	0.821	0.741	0.781	0.911	0.331	0.501	0.231
70	0.501	0.981	0.121	0.581	0.801	0.851	0.501
71	0.371	0.901	0.121	0.271	0.151	0.301	0.501
72	0.461	0.831	0.271	0.271	0.111	0.391	0.231
73	0.571	0.631	0.781	0.731	0.411	0.391	0.231
74	0.031	0.301	0.271	0.731	0.201	0.701	0.351
75	0.771	0.741	0.611	0.791	0.261	0.851	0.951
76	0.571	0.741	0.781	0.501	0.571	0.781	0.231
77	0.081	0.391	0.971	0.911	0.061	0.851	0.501
78	0.771	0.301	0.051	0.121	0.041	0.301	0.081
79	0.031	0.051	0.991	0.031	0.021	0.011	0.011
80	0.131	0.221	0.901	0.161	0.261	0.151	0.141
81	0.031	0.391	0.931	0.121	0.571	0.951	0.141
82	0.821	0.741	0.781	0.421	0.571	0.301	0.231
83	0.301	0.741	0.781	0.421	0.571	0.301	0.031
84	0.951	0.501	0.051	0.731	0.261	0.501	0.821
85	0.151	0.391	0.931	0.161	0.261	0.111	0.081
86	0.151	0.961	0.051	0.161	0.411	0.611	0.141
87	0.371	0.831	0.501	0.421	0.501	0.221	0.231
88	0.031	0.051	0.991	0.011	0.021	0.011	0.011
89	0.501	0.741	0.781	0.581	0.571	0.391	0.231
90	0.341	0.631	0.501	0.121	0.631	0.391	0.231
91	0.201	0.391	0.701	0.501	0.331	0.501	0.821
92	0.651	0.741	0.501	0.161	0.691	0.301	0.501
93	0.421	0.631	0.271	0.731	0.841	0.301	0.501
94	0.571	0.741	0.501	0.501	0.111	0.071	0.501
95	0.071	0.901	0.051	0.161	0.081	0.501	0.351
96	0.651	0.391	0.781	0.911	0.691	0.931	0.681
97	0.341	0.831	0.271	0.791	0.631	0.781	0.821
98	0.421	0.831	0.121	0.271	0.151	0.611	0.031
99	0.181	0.631	0.051	0.211	0.631	0.391	0.141
100	0.651	0.391	0.501	0.421	0.571	0.391	0.231
101	0.891	0.901	0.121	0.271	0.501	0.151	0.231
102	0.651	0.941	0.051	0.421	0.571	0.301	0.951
103	0.571	0.901	0.121	0.881	0.901	0.501	0.681
104	0.071	0.221	0.051	0.121	0.331	0.501	0.031
105	0.371	0.741	0.851	0.501	0.571	0.301	0.231
106	0.041	1.001	0.991	0.011	0.021	0.011	0.011
107	0.301	0.741	0.781	0.421	0.571	0.301	0.231
108	0.501	0.631	0.501	0.421	0.571	0.221	0.351
109	0.651	0.991	0.051	0.941	0.631	0.851	0.501
110	0.651	0.991	0.271	0.791	0.941	0.501	0.821
111	0.301	0.741	0.501	0.661	0.691	0.301	0.501
112	0.201	0.391	0.931	0.341	0.261	0.111	0.081
113	0.571	0.391	0.701	0.421	0.151	0.501	0.351
114	0.771	0.741	0.271	0.581	0.691	0.611	0.351
115	0.301	0.741	0.781	0.421	0.571	0.301	0.231
116	0.951	0.741	0.781	0.941	0.971	0.951	0.231
117	0.031	0.151	0.901	0.661	0.151	0.781	0.351
118	0.821	0.151	0.051	0.791	0.921	0.951	0.951
119	0.951	0.071	0.051	0.581	0.411	0.891	0.951
120	0.571	0.741	0.931	0.031	0.061	0.071	0.141
121	0.371	0.831	0.501	0.421	0.571	0.391	0.231
122	0.201	0.391	0.951	0.061	0.331	0.071	0.081
123	0.301	0.741	0.121	0.421	0.501	0.851	0.501
124	0.501	0.741	0.501	0.581	0.571	0.221	0.231
125	0.501	0.831	0.781	0.731	0.801	0.501	0.141
126	0.951	0.221	0.931	0.211	0.061	0.111	0.031
127	0.031	0.941	0.851	0.121	0.631	0.221	0.231
128	0.821	0.741	0.851	0.911	0.921	0.851	0.821
129	0.921	0.831	0.051	0.061	0.151	0.301	0.231
130	0.071	0.741	0.611	0.731	0.111	0.031	0.081
131	0.421	0.941	0.051	0.341	0.031	0.221	0.031
132	0.041	0.901	0.781	0.731	0.411	0.221	0.351
133	0.771	0.631	0.271	0.341	0.691	0.701	0.501
134	0.421	0.501	0.501	0.581	0.691	0.501	0.501
135	0.951	0.741	0.051	0.911	0.041	0.151	0.681
136	0.421	0.831	0.701	0.341	0.111	0.611	0.231
137	0.501	0.391	0.701	0.791	0.571	0.851	0.681
138	0.301	0.741	0.781	0.421	0.571	0.301	0.231
139	0.301	0.741	0.051	0.211	0.571	0.501	0.501
140	0.771	0.051	0.121	0.581	0.871	0.951	0.501
141	0.461	0.631	0.501	0.661	0.631	0.611	0.231
142	0.341	0.501	0.781	0.501	0.111	0.051	0.141
143	0.301	0.741	0.781	0.421	0.571	0.301	0.231
144	0.821	0.631	0.501	0.501	0.111	0.501	0.011
145	0.031	0.151	0.951	0.021	0.261	0.151	0.051
146	0.031	0.741	0.781	0.051	0.411	0.151	0.231
147	0.501	0.501	0.851	0.341	0.201	0.221	0.081
148	0.151	0.741	0.701	0.421	0.111	0.071	0.231
149	0.951	0.151	0.051	0.971	0.961	0.951	0.951
150	0.891	0.051	0.051	0.951	0.801	0.891	0.951
151	0.771	0.221	0.051	0.971	0.971	0.891	0.951
152	0.951	0.301	0.051	0.881	0.871	0.891	0.951
153	0.231	0.391	0.781	0.791	0.501	0.611	0.231
154	0.371	0.391	0.501	0.661	0.261	0.151	0.821
155	0.711	0.391	0.051	0.211	0.081	0.501	0.821
156	0.861	0.111	0.051	0.981	0.971	0.891	0.951
157	0.461	0.051	0.051	0.941	0.971	0.951	0.951
158	0.951	0.051	0.051	0.981	0.971	0.951	0.951
159	0.261	0.501	0.701	0.581	0.691	0.501	0.501
160	0.711	0.111	0.051	0.841	0.871	0.701	0.951
161	0.111	0.501	0.271	0.341	0.041	0.611	0.351
162	0.301	0.741	0.781	0.421	0.571	0.301	0.231
163	0.501	0.051	0.051	0.421	0.571	0.951	0.501
164	0.371	0.741	0.501	0.211	0.061	0.301	0.231
165	0.951	0.741	0.781	0.941	0.801	0.951	0.951
166	0.031	0.051	0.851	0.161	0.201	0.891	0.231
167	0.941	0.391	0.051	0.951	0.801	0.851	0.951
168	0.201	0.741	0.901	0.341	0.501	0.611	0.231
169	0.951	0.051	0.051	0.981	0.971	0.951	0.951
170	0.651	0.631	0.051	0.841	0.691	0.701	0.501
171	0.651	0.301	0.051	0.791	0.201	0.221	0.821
172	0.181	0.741	0.851	0.731	0.921	0.391	0.821
173	0.821	0.221	0.051	0.791	0.801	0.611	0.821
174	0.821	0.151	0.051	0.971	0.971	0.891	0.901
175	0.651	0.151	0.051	0.941	0.941	0.931	0.951
176	0.821	0.051	0.051	0.941	0.871	0.891	0.951
177	0.501	0.301	0.051	0.731	0.901	0.701	0.821
178	0.821	0.051	0.051	0.841	0.961	0.951	0.951
179	0.181	0.301	0.851	0.091	0.201	0.071	0.141
180	0.501	0.501	0.701	0.881	0.411	0.851	0.821
181	0.421	0.831	0.951	0.581	0.751	0.301	0.351
182	0.501	0.741	0.781	0.501	0.571	0.391	0.231
183	0.371	0.741	0.501	0.341	0.411	0.221	0.501
184	0.891	0.941	0.051	0.161	0.331	0.611	0.351
185	0.571	0.631	0.271	0.421	0.331	0.301	0.501
186	0.301	0.051	0.501	0.501	0.691	0.391	0.821
187	0.951	0.071	0.051	0.981	0.971	0.951	0.951
188	0.421	0.051	0.051	0.581	0.691	0.611	0.951
189	0.921	0.051	0.051	0.951	0.951	0.891	0.951
190	0.301	0.301	0.051	0.841	0.921	0.781	0.951
191	0.861	0.051	0.051	0.911	0.951	0.851	0.951
192	0.421	0.151	0.051	0.791	0.871	0.701	0.821
193	0.501	0.051	0.051	0.661	0.801	0.701	0.951
194	0.341	0.051	0.051	0.501	0.751	0.701	0.951
195	0.301	0.051	0.051	0.661	0.691	0.501	0.951
196	0.261	0.051	0.051	0.501	0.411	0.391	0.901
197	0.571	0.051	0.051	0.941	0.801	0.701	0.951
198	0.861	0.051	0.051	0.951	0.971	0.501	0.951
199	0.301	0.051	0.051	0.791	0.921	0.851	0.951
200	0.261	0.051	0.051	0.421	0.841	0.611	0.951
201	0.821	0.051	0.051	0.971	0.871	0.781	0.951
202	0.261	0.051	0.051	0.881	0.951	0.851	0.951
203	0.821	0.051	0.051	0.951	0.961	0.891	0.951
204	0.261	0.051	0.051	0.581	0.921	0.891	0.951
205	0.301	0.051	0.051	0.661	0.921	0.701	0.951
206	0.501	0.051	0.051	0.731	0.921	0.851	0.951
207	0.421	0.051	0.051	0.881	0.871	0.851	0.951
208	0.301	0.051	0.051	0.791	0.961	0.931	0.951
209	0.231	0.051	0.051	0.421	0.571	0.301	0.681
210	0.261	0.051	0.051	0.661	0.691	0.391	0.951
211	0.951	0.051	0.051	0.981	0.971	0.951	0.951
212	0.711	0.051	0.051	0.731	0.801	0.891	0.951
213	0.711	0.051	0.051	0.971	0.921	0.781	0.951
214	0.461	0.051	0.051	0.581	0.411	0.781	0.951
215	0.821	0.051	0.051	0.911	0.901	0.851	0.951
216	0.651	0.051	0.051	0.731	0.901	0.891	0.951
217	0.771	0.051	0.051	0.971	0.971	0.951	0.951
218	0.501	0.151	0.051	0.501	0.631	0.611	0.901
219	0.571	0.051	0.051	0.661	0.571	0.611	0.901
220	0.501	0.151	0.051	0.581	0.411	0.891	0.821
221	0.771	0.051	0.051	0.881	0.151	0.951	0.951
222	0.461	0.051	0.051	0.731	0.261	0.781	0.951
223	0.651	0.051	0.051	0.581	0.501	0.891	0.821
224	0.711	0.051	0.051	0.731	0.691	0.851	0.951
225	0.181	0.741	0.781	0.091	0.261	0.221	0.501
226	0.261	0.221	0.501	0.211	0.201	0.611	0.501
227	0.921	0.301	0.051	0.661	0.691	0.891	0.231
228	0.031	0.301	0.501	0.501	0.261	0.111	0.821
229	0.461	0.741	0.271	0.421	0.331	0.611	0.081
230	0.461	0.151	0.901	0.911	0.261	0.611	0.501
231	0.771	0.741	0.501	0.421	0.841	0.781	0.501
232	0.301	0.631	0.901	0.421	0.411	0.221	0.141
233	0.501	0.741	0.271	0.501	0.331	0.391	0.231
234	0.341	0.741	0.051	0.581	0.501	0.301	0.501
235	0.461	0.741	0.121	0.421	0.571	0.701	0.351
236	0.071	0.391	0.611	0.091	0.041	0.111	0.081
237	0.951	0.831	0.051	0.791	0.691	0.701	0.821
238	0.501	0.941	0.501	0.731	0.801	0.611	0.501
239	0.891	0.741	0.051	0.581	0.261	0.701	0.821
240	0.711	0.831	0.121	0.421	0.201	0.301	0.351
241	0.261	0.501	0.901	0.421	0.411	0.301	0.141
242	0.151	0.391	0.611	0.421	0.151	0.391	0.081
243	0.421	0.831	0.051	0.341	0.631	0.701	0.351
244	0.111	0.391	0.501	0.421	0.631	0.031	0.231
245	0.371	0.151	0.501	0.421	0.331	0.221	0.681
246	0.711	0.831	0.121	0.051	0.691	0.301	0.231
247	0.571	0.941	0.051	0.091	0.201	0.391	0.821
248	0.821	0.501	0.611	0.211	0.801	0.891	0.821
249	0.031	0.071	0.981	0.021	0.021	0.011	0.031
250	0.341	0.941	0.051	0.421	0.081	0.301	0.081
251	0.031	0.741	0.611	0.031	0.201	0.111	0.901
252	0.711	0.831	0.271	0.501	0.261	0.501	0.231
253	0.571	0.741	0.271	0.421	0.501	0.391	0.231
254	0.711	0.221	0.501	0.731	0.951	0.851	0.351
255	0.371	0.741	0.051	0.501	0.751	0.611	0.821
256	0.501	0.901	0.611	0.271	0.411	0.611	0.141
257	0.821	0.391	0.271	0.731	0.691	0.951	0.951
258	0.941	0.501	0.271	0.421	0.631	0.851	0.501
259	0.301	0.901	0.701	0.091	0.151	0.051	0.051
260	0.651	0.901	0.901	0.791	0.331	0.301	0.351
261	0.501	0.941	0.501	0.731	0.801	0.611	0.501
262	0.031	0.051	0.991	0.011	0.021	0.011	0.011
263	0.501	0.741	0.501	0.421	0.331	0.301	0.231
264	0.571	0.741	0.701	0.731	0.571	0.611	0.351
265	0.301	0.901	0.051	0.051	0.261	0.501	0.351
266	0.421	0.501	0.611	0.661	0.081	0.221	0.501
267	0.951	0.631	0.611	0.501	0.501	0.151	0.231
268	0.821	0.991	0.271	0.791	0.841	0.851	0.501
269	0.151	0.501	0.051	0.731	0.411	0.301	0.501
270	0.031	0.391	0.931	0.121	0.061	0.011	0.081
271	0.771	0.501	0.051	0.791	0.751	0.851	0.821
272	0.771	0.901	0.501	0.421	0.501	0.391	0.231
273	0.261	0.391	0.271	0.731	0.111	0.301	0.231
274	0.421	0.831	0.271	0.061	0.041	0.301	0.031
275	0.301	0.501	0.501	0.581	0.501	0.391	0.231
276	0.301	0.741	0.781	0.501	0.691	0.851	0.501
277	0.501	0.631	0.851	0.271	0.331	0.301	0.231
278	0.341	0.901	0.051	0.051	0.021	0.391	0.501
279	0.461	0.631	0.501	0.501	0.261	0.701	0.501
280	0.301	0.941	0.051	0.211	0.081	0.221	0.081
281	0.261	0.301	0.271	0.731	0.201	0.611	0.051
282	0.301	0.901	0.781	0.271	0.081	0.301	0.051
283	0.821	0.631	0.121	0.501	0.631	0.851	0.821
284	0.461	0.391	0.271	0.211	0.571	0.611	0.501
285	0.151	0.741	0.271	0.421	0.081	0.021	0.231
286	0.571	0.901	0.611	0.661	0.801	0.501	0.681
287	0.101	0.301	0.951	0.791	0.801	0.031	0.141
288	0.071	0.391	0.931	0.841	0.751	0.611	0.351
289	0.821	0.501	0.121	0.211	0.411	0.501	0.231
290	0.771	0.151	0.901	0.421	0.061	0.111	0.051
291	0.371	0.501	0.051	0.211	0.081	0.611	0.351
292	0.891	0.981	0.051	0.341	0.631	0.781	0.821
293	0.861	0.501	0.051	0.161	0.151	0.301	0.951
294	0.891	0.941	0.051	0.501	0.411	0.781	0.501
295	0.181	0.741	0.781	0.421	0.571	0.301	0.231
296	0.301	0.741	0.781	0.341	0.411	0.031	0.351
297	0.861	0.901	0.051	0.661	0.841	0.501	0.821
298	0.501	0.981	0.051	0.791	0.691	0.701	0.501
299	0.821	0.631	0.271	0.941	0.751	0.891	0.501
300	0.151	0.391	0.951	0.661	0.901	0.611	0.821
301	0.341	0.631	0.501	0.581	0.151	0.611	0.231
302	0.231	0.501	0.701	0.211	0.331	0.501	0.231
303	0.151	0.111	0.901	0.661	0.631	0.851	0.351
304	0.921	0.631	0.271	0.661	0.571	0.501	0.231
305	0.261	0.051	0.501	0.421	0.081	0.851	0.231
306	0.151	0.391	0.931	0.091	0.151	0.031	0.141
307	0.501	0.391	0.931	0.731	0.801	0.611	0.081
308	0.301	0.741	0.781	0.421	0.571	0.301	0.231
309	0.301	0.741	0.781	0.421	0.571	0.301	0.231
310	0.951	0.301	0.501	0.881	0.751	0.951	0.681
311	0.501	0.961	0.701	0.501	0.631	0.611	0.351
312	0.921	0.741	0.611	0.581	0.631	0.851	0.351
313	0.711	0.631	0.611	0.421	0.631	0.611	0.501
314	0.111	0.151	0.981	0.421	0.571	0.301	0.501
315	0.861	0.741	0.051	0.581	0.631	0.891	0.821
316	0.231	0.741	0.121	0.051	0.201	0.221	0.081
317	0.771	0.221	0.271	0.841	0.751	0.891	0.821
318	0.461	0.501	0.701	0.421	0.201	0.221	0.081
319	0.371	0.741	0.121	0.421	0.501	0.301	0.231
320	0.651	0.151	0.701	0.061	0.151	0.501	0.231
321	0.861	0.831	0.611	0.841	0.331	0.391	0.141
322	0.501	0.741	0.051	0.791	0.501	0.501	0.231
323	0.821	0.391	0.051	0.421	0.261	0.221	0.231
324	0.341	0.901	0.051	0.421	0.501	0.851	0.501
325	0.501	0.831	0.701	0.421	0.331	0.501	0.501
326	0.771	0.051	0.931	0.731	0.201	0.891	0.051
327	0.031	0.051	0.991	0.011	0.021	0.011	0.011
328	0.651	0.501	0.271	0.731	0.151	0.501	0.501
329	0.951	0.391	0.051	0.661	0.081	0.501	0.951
330	0.371	0.151	0.501	0.421	0.691	0.391	0.231
331	0.341	0.741	0.501	0.271	0.331	0.301	0.051
332	0.501	0.941	0.501	0.161	0.261	0.111	0.501
333	0.821	0.741	0.781	0.581	0.411	0.701	0.501
334	0.501	0.941	0.051	0.911	0.631	0.851	0.351
335	0.421	0.301	0.501	0.661	0.411	0.301	0.231
336	0.651	0.501	0.121	0.341	0.571	0.611	0.821
337	0.461	0.831	0.051	0.661	0.871	0.611	0.951
338	0.771	0.391	0.121	0.161	0.751	0.701	0.501
339	0.891	0.901	0.051	0.161	0.201	0.391	0.821
340	0.711	0.111	0.701	0.881	0.901	0.701	0.231
341	0.151	0.831	0.121	0.421	0.201	0.301	0.231
342	0.131	0.391	0.121	0.791	0.411	0.781	0.231
343	0.821	0.991	0.051	0.911	0.921	0.851	0.821
344	0.951	0.051	0.051	0.941	0.971	0.951	0.951
345	0.821	0.741	0.051	0.211	0.081	0.151	0.501
346	0.771	0.741	0.701	0.421	0.061	0.111	0.951
347	0.301	0.741	0.781	0.421	0.571	0.301	0.231
348	0.711	0.741	0.051	0.731	0.411	0.301	0.231
349	0.711	0.391	0.051	0.791	0.151	0.391	0.821
350	0.651	0.151	0.501	0.731	0.921	0.701	0.501
351	0.421	0.221	0.781	0.501	0.571	0.501	0.821
352	0.301	0.941	0.051	0.061	0.261	0.111	0.141
353	0.571	0.961	0.051	0.421	0.631	0.301	0.821
354	0.711	0.301	0.121	0.791	0.901	0.701	0.681
355	0.301	0.741	0.781	0.421	0.571	0.301	0.231
356	0.421	0.391	0.781	0.581	0.111	0.151	0.501
357	0.181	0.501	0.701	0.051	0.081	0.501	0.141
358	0.951	0.901	0.051	0.501	0.331	0.851	0.901
359	0.711	0.831	0.501	0.421	0.411	0.391	0.231
360	0.501	0.501	0.611	0.951	0.261	0.391	0.501
361	0.821	0.741	0.051	0.881	0.411	0.701	0.901
362	0.711	0.501	0.121	0.421	0.331	0.701	0.821
363	0.461	0.741	0.121	0.421	0.081	0.221	0.231
364	0.771	0.051	0.991	0.011	0.021	0.021	0.011
365	0.711	0.051	0.051	0.501	0.331	0.701	0.681
366	0.821	0.741	0.051	0.581	0.261	0.501	0.231
367	0.821	0.941	0.501	0.661	0.331	0.221	0.351
368	0.501	0.741	0.781	0.421	0.691	0.501	0.231
369	0.711	0.941	0.501	0.211	0.081	0.611	0.231
370	0.891	0.391	0.951	0.341	0.151	0.151	0.351
371	0.771	0.941	0.271	0.341	0.151	0.221	0.501
372	0.461	0.151	0.121	0.581	0.501	0.701	0.351
373	0.501	0.741	0.781	0.271	0.501	0.301	0.231
374	0.771	0.051	0.051	0.941	0.691	0.951	0.951
375	0.501	0.901	0.971	0.091	0.631	0.071	0.051
376	0.711	0.831	0.701	0.061	0.081	0.221	0.231
377	0.651	0.051	0.051	0.841	0.631	0.931	0.951
378	0.891	0.051	0.051	0.421	0.691	0.931	0.951
379	0.571	0.301	0.501	0.421	0.751	0.391	0.501
380	0.711	0.151	0.051	0.501	0.751	0.931	0.951
381	0.501	0.051	0.051	0.731	0.571	0.931	0.951
382	0.341	0.051	0.051	0.581	0.871	0.701	0.951
383	0.571	0.501	0.931	0.271	0.151	0.391	0.501
384	0.201	1.001	0.051	0.011	0.031	0.011	0.951
385	0.951	0.051	0.051	0.661	0.871	0.951	0.951
386	0.301	0.051	0.701	0.911	0.571	0.851	0.821
387	0.651	0.501	0.051	0.271	0.111	0.391	0.351
388	0.651	0.051	0.051	0.911	0.921	0.951	0.821
389	0.501	0.051	0.051	0.731	0.871	0.931	0.821
390	0.371	0.391	0.931	0.791	0.201	0.501	0.231
391	0.501	0.051	0.051	0.731	0.751	0.951	0.951
392	0.301	0.051	0.051	0.421	0.751	0.931	0.951
393	0.301	0.051	0.051	0.421	0.971	0.931	0.951
394	0.821	0.501	0.051	0.211	0.201	0.611	0.821
395	0.571	0.391	0.851	0.791	0.871	0.501	0.821
396	0.571	0.301	0.051	0.061	0.501	0.501	0.821
397	0.571	0.301	0.901	0.051	0.111	0.501	0.081
398	0.861	0.631	0.781	0.211	0.111	0.611	0.231
399	0.501	0.961	0.501	0.791	0.801	0.781	0.351
400	0.951	1.001	0.051	0.981	0.971	0.951	0.951
401	0.201	0.501	0.501	0.271	0.151	0.151	0.231
402	0.571	0.741	0.851	0.211	0.331	0.391	0.351
403	0.651	0.391	0.611	0.421	0.081	0.301	0.351
404	0.951	0.391	0.501	0.731	0.571	0.611	0.951
405	0.231	0.741	0.781	0.061	0.261	0.701	0.501
406	0.951	0.391	0.851	0.581	0.261	0.611	0.681
407	0.421	0.831	0.501	0.421	0.111	0.301	0.501
408	0.261	0.501	0.931	0.271	0.261	0.501	0.051
409	0.771	0.991	0.121	0.731	0.901	0.851	0.821
410	0.821	0.831	0.971	0.661	0.411	0.071	0.081
411	0.461	0.391	0.051	0.661	0.331	0.221	0.351
412	0.571	0.391	0.501	0.501	0.331	0.501	0.821
413	0.821	0.741	0.501	0.161	0.201	0.611	0.501
414	0.421	0.901	0.121	0.421	0.151	0.391	0.821
415	0.301	0.741	0.781	0.271	0.571	0.501	0.231
416	0.651	0.501	0.901	0.841	0.631	0.701	0.821
417	0.651	0.391	0.701	0.791	0.751	0.851	0.821
418	0.821	0.831	0.701	0.981	0.941	0.951	0.501
419	0.031	0.941	0.701	0.271	0.111	0.221	0.231
420	0.301	0.741	0.501	0.341	0.261	0.221	0.501
421	0.951	1.001	0.051	0.981	0.971	0.951	0.951
422	0.341	0.941	0.701	0.841	0.751	0.611	0.141
423	0.421	0.901	0.271	0.421	0.201	0.151	0.231
424	0.771	0.831	0.271	0.791	0.571	0.611	0.501
425	0.771	0.301	0.611	0.501	0.411	0.221	0.081
426	0.951	0.741	0.051	0.501	0.501	0.391	0.501
427	0.071	0.741	0.781	0.271	0.411	0.111	0.231
