# Supplementary material for: A Configurational-Game Theoretic Analysis of Consumer Behavior and Platform Strategy in Paid Study Rooms: Evidence from a Chinese Platform
Source: Research Square preprint supplement (doi:10.21203/rs.3.rs-8592354/v1), 2026-02-12
Supplement: Supplementary file 3 [file bca45eab5f88efa6ef181407.docx]

**Appendix A: Questionnaire**

**Dear madam/sir:**

Hello! Thank you for taking the time to participate in this survey. This questionnaire is used for the study on **paid study rooms (PSRs)**. Your answer is very important to our research. Please answer according to your actual situation and ideas. We promise that all information will be used for research purposes and will not disclose your privacy. The research has obtained relevant **ethical approval**. Before completing this questionnaire, please read the relevant supplementary materials of the **informed consent**. When you submit this questionnaire, we will consider that you have read, understood, and agreed to the above content. Thank you for your cooperation!

**Part One**

**The following is a description of your basic personal information. Please choose according to the actual situation:**

1. Your gender is ( ). [single choice] [required]

A. Male

B. Female

2. Your age is ( ). [single choice] [required]

A. 18-20 years old

B. 21-25 years old

C. 26-30 years old

D. 31-35 years old

E. 36-40 years old

F. 40-50 years old

G. > 50 years old

3. Your education background is ( ). [single choice question] [required question]

A. Primary school

B. Junior high school

C. High school

D. Technical secondary school

E. Junior College

F. Undergraduate

G. Master and above

4. Your disposable income per month is ( ). [single choice] [required]

A. < 1000 yuan

B. 1001-2000 yuan

C. 2001-3000 yuan

D. 3001-4000 yuan

E. 4001-5000 yuan

F. 5001-6000 yuan

G. > 6000 yuan

**Part Two**

**1. The perceived profits (PP) obtained by TimeFlies Study Room are as followings: 1=totally disagree, 2=disagree, 3=relatively disagree, 4=average, 5=relatively agree, 6=agree, and 7=fully agree**

PP1: The paid study room can meet the needs of learning and working venues in terms of paid study room basic function (Usage profit). [matrix single choice question] [required]

1 2 3 4 5 6 7

PP2: Various activities provided by the paid study room can enable me to make more friends, such as happy reading marathon, early reading and clock in, time management sharing (Social profit). [matrix single choice question] [required question]

1 2 3 4 5 6 7

PP3: The immersive learning in the offline paid study room venue allows me to experience the flow of heart and feel happy (Emotional profit: sense of pleasure). [matrix single choice question] [required question]

1 2 3 4 5 6 7

PP4: The self-driven growth learning atmosphere in the paid study room can give me a sense of motivation (Emotional profit: sense of satisfaction). [matrix single choice question] [required question]

1 2 3 4 5 6 7

PP5: The personal achievements exhibited in the examination museum can bring me a sense of achievement (Emotional profit: sense of achievement). [matrix single choice question] [required]

1 2 3 4 5 6 7

**2. The perceived costs (PC) borne by obtained by TimeFlies Study Room are as followings: 1=totally disagree, 2=disagree, 3=relatively disagree, 4=average, 5=relatively agree, 6=agree, and 7=fully agree**

PC1: I think the financial giving of using the paid study room related products or services is reasonable (Capital cost). [matrix single choice question] [required]

1 2 3 4 5 6 7

PC2: I think the time cost of using the paid study room related products or services is reasonable (Time cost). [matrix single choice question] [required]

1 2 3 4 5 6 7

PC3: I think the process of using paid study room related services to understand information such as IT usage availability is convenient (Information cost). [matrix single choice question] [required question]

1 2 3 4 5 6 7

**3. The perceived risks (PR) obtained by TimeFlies Study Room are as followings: 1=totally disagree, 2=disagree, 3=relatively disagree, 4=average, 5=relatively agree, 6=agree, and 7=fully agree**

PR1: I am worried that personal information will be disclosed in the process of using the paid study room service, such as applet authorization, APP privacy collection, and online customer service Q&A. [matrix single choice question] [required]

1 2 3 4 5 6 7

PR2: I am worried that I have paid for products and services of the paid study room which are not in line with expectations. For example, some offline venues do not have a private room/seminar room/reading room (Functional risk). [matrix single choice question] [required]

1 2 3 4 5 6 7

PR3: I am worried that I may have spent a lot of money on the package purchase in the paid study room, but in the end, I cannot finish using it within the specified time (Financial risk). [matrix single choice question] [required]

1 2 3 4 5 6 7

**4.** **The expected utilities (EU) obtained by obtained by TimeFlies Study Room are as followings: 1=totally disagree, 2=disagree, 3=relatively disagree, 4=average, 5=relatively agree, 6=agree, and 7=fully agree**

EU1: The paid study room is very useful to me, including but not limited to the overall design of the venue, the provision of public supplies, the division of rest area and dining area (Venue utility). [matrix single choice] [required]

1 2 3 4 5 6 7

EU2: The paid study room is very useful for me, including but not limited to the appointment system, online customer service, smart access control and storage cabinet (Technical utility). [matrix single choice question] [required question]

1 2 3 4 5 6 7

EU3: The consumption mode provided by the offline paid study room venues is reasonable, such as various consumption packages, flexible billing mode, locker leasing (Consumption mode). [matrix single choice] [required]

1 2 3 4 5 6 7

EU4: The user experience of the paid study room is very good, such as self-service reservation service, timely customer service response (User experience). [matrix single choice question] [required question]

1 2 3 4 5 6 7

**5. The facilitating conditions (FC) recognized by TimeFlies Study Room are as followings: 1=totally disagree, 2=disagree, 3=relatively disagree, 4=average, 5=relatively agree, 6=agree, and 7=fully agree**

FC1: The geographical location of paid study room is convenient for me in terms of transportation such as nearby bus stations or subway lines, or easy for parking (Location advantage). [matrix single choice question] [required]

1 2 3 4 5 6 7

FC2: The paid study room operation guide and related information are easily accessible online, and there are no barriers to use offline (Limit breaking). [matrix single choice question] [required question]

1 2 3 4 5 6 7

FC3: The online activity live broadcast lottery in the paid study room prompts me to understand the brand and use relevant services (Direct marketing). [matrix single choice question] [required question]

1 2 3 4 5 6 7

FC4: Activities of the paid study room new venue will encourage me to use and consume (Sales promotion). [matrix single choice question] [required question]

1 2 3 4 5 6 7

**6. The consuming intentions (CI) driven by TimeFlies Study Room are as followings: 1=totally disagree, 2=disagree, 3=relatively disagree, 4=average, 5=relatively agree, 6=agree, and 7=fully agree**

CI1: I will consider using the venue services of paid study rooms if possible (Intention to consider). [matrix single choice question] [required question]

1 2 3 4 5 6 7

CI2: I am willing to consume various services of the paid study room when necessary (Intention to consume). [matrix single choice question] [required question]

1 2 3 4 5 6 7

CI3: I will recommend other consumers to use the services provided by the paid study room (Intention to recommend). [matrix single choice question] [required question]

1 2 3 4 5 6 7

**7. The consuming behaviors (CB) caused by TimeFlies Study Room are as followings: 1=totally disagree, 2=disagree, 3=relatively disagree, 4=average, 5=relatively agree, 6=agree, and 7=fully agree**

CB1: I use paid study room services more than other types of services , e.g. free library, Starbucks “third space”. [matrix single choice question] [required question]

1 2 3 4 5 6 7

CB2: The length of the paid study room I have used is (units: minutes). [matrix single choice question] [required question]

1 2 3 4 5 6 7

(1-7 are respectively expressed as follows: 1 for "100-300 minutes"; 2 for "301-500 minutes"; 3 for "501-800 minutes"; 4 for "801-1000 minutes"; 5 for "1001-2000 minutes"; 6 for "2001-3000 minutes"; 7 for "more than 3000 minutes".)
